# Supplementary material for: A single column separation method for barium isotope analysis of geologic and hydrologic materials with complex matrices
Source: PubMed Central journal article supplement (PMC8359043; doi:10.1186/s12932-021-00077-z), 2021-08-11
Supplement: 12932_2021_77_MOESM1_ESM.pdf [file 12932_2021_77_MOESM1_ESM.pdf]

## **Supplementary Information**

### **Additional file 1**

# **A single column separation method for barium isotope analysis of geologic and hydrologic materials with complex matrices**

**Matecha, R. M.<sup>a</sup>, Capo, R. C.<sup>a</sup>, Stewart, B. W.<sup>a</sup>, Thompson, R.L.<sup>b,c</sup>, Hakala, J. A.<sup>b</sup>**

<sup>a</sup>Department of Geology & Environmental Science, University of Pittsburgh, Pittsburgh, PA  
15260, USA

<sup>b</sup>National Energy Technology Laboratory, 626 Cochrans Mill Road, P.O. Box 10940, Pittsburgh,  
PA 15236-0940, USA

<sup>c</sup>NETL Support Contractor, 626 Cochrans Mill Road, P.O. Box 10940, Pittsburgh, PA 15236-  
0940, USA

***Geochemical Transactions***

**Additional file 1: Table S1. Information on samples used for column calibration experiments.**

| Sample            | Location                         | Description                         | Source                                    | Ba                         |
|-------------------|----------------------------------|-------------------------------------|-------------------------------------------|----------------------------|
| NASS-6            | off coast of Nova Scotia, Canada | open seawater                       | Nat. Res. Council Canada Ref. Material    | 184 µg/L                   |
| OR-1204-1a        | Allegheny County, Pennsylvania   | river water                         | Collected by authors from Ohio River      | 48.3 µg/L                  |
| M4TFA0518         | Greene County, Pennsylvania      | Marcellus Shale produced water      | Collected by authors from active well     | 16,400 µg/L                |
| PA-LO-102714      | Venango County, Pennsylvania     | freshwater mussel shell (aragonite) | Collected by authors from Allegheny River | n/a                        |
| Volcanic silicate | southern Alaska                  | rhyolite-andesite composite         | See manuscript reference [36].            | 200-600 mg/kg <sup>a</sup> |
| Marcellus shale   | Morgantown, West Virginia        | organic-rich shale from core        | MSEEL <sup>b</sup>                        | 1,300 mg/kg                |
| BCR-2             | Bridal Veil Flow Quarry, Oregon  | basalt, Columbia River Gorge        | USGS Reference Material                   | 677 mg/kg <sup>c</sup>     |
| AGV-1             | southern Oregon                  | andesite                            | USGS Reference Material                   | 1,200 mg/kg <sup>c</sup>   |

<sup>a</sup>Range of concentrations in samples used in composite

<sup>b</sup>Marcellus Shale Energy and Environment Laboratory: <http://www.mseel.org>

<sup>c</sup>Data from Raczek et al., manuscript reference [37].

**Additional file 1: Table S2.** Thermo Element® ICP-MS signal intensity (in counts per second) for a column calibration using 2.0 N HCl for the entire elution of a dissolved silicate volcanic rock. All column cuts were diluted to 15 mL prior to analysis. The data (recalculated as fraction of total eluted) are plotted in Fig. S1a.

| mL added<br>to column | Cumulative<br>volume | Na23(MR) <sup>a</sup><br>cps <sup>c</sup> | Mg24(MR)<br>cps | Ca46(MR)<br>cps | Fe56(MR)<br>cps | Sr88(LR) <sup>b</sup><br>cps | Ba137(LR)<br>cps | La139(LR)<br>cps | Ce140(LR)<br>cps |
|-----------------------|----------------------|-------------------------------------------|-----------------|-----------------|-----------------|------------------------------|------------------|------------------|------------------|
| 0.5                   | 0.5                  | 1345851                                   | 31152           | 79              | 14956           | 21449                        | 1874             | 951              | 1865             |
| 0.5                   | 1                    | 2143399                                   | 1172966         | 833256          | 66505           | 76611                        | 37784            | 2330             | 3673             |
| 0.5                   | 1.5                  | 3298254                                   | 2010265         | 2703534         | 4550209         | 116555                       | 54060            | 3222             | 4343             |
| 0.5                   | 2                    | 2299369                                   | 432109          | 94416           | 34331941        | 22454                        | 6390             | 664              | 1326             |
| 2                     | 4                    | 102604622                                 | 13477017        | 92887           | 164870323       | 34102                        | 8974             | 803              | 1326             |
| 5                     | 9                    | 29013226                                  | 58298212        | 53751           | 62935406        | 86154                        | 8246             | 506              | 1103             |
| 5                     | 14                   | 1182372                                   | 158898          | 10401           | 176996          | 5891739                      | 7061             | 433              | 889              |
| 5                     | 19                   | 920620                                    | 25719           | 1125            | 23286           | 20384998                     | 5873             | 489              | 981              |
| 5                     | 24                   | 1291038                                   | 12356           | 322             | 13850           | 5031319                      | 5094             | 392              | 925              |
| 5                     | 29                   | 955782                                    | 14252           | 132             | 22001           | 1376019                      | 15593            | 686              | 1195             |
| 5                     | 34                   | 937024                                    | 12539           | 123             | 70376           | 266045                       | 138942           | 811              | 1429             |
| 5                     | 39                   | 935974                                    | 19311           | 161             | 47358           | 58117                        | 612423           | 884              | 1579             |
| 5                     | 44                   | 859736                                    | 9399            | 146             | 38899           | 14227                        | 1048728          | 934              | 1179             |
| 5                     | 49                   | 1111384                                   | 15348           | 83              | 104323          | 7614                         | 896031           | 942              | 3222             |
| 5                     | 54                   | 891796                                    | 9413            | 108             | 55600           | 4482                         | 564025           | 964              | 12143            |
| 5                     | 59                   | 960798                                    | 13612           | 96              | 161226          | 5598                         | 288738           | 1840             | 51083            |
| 5                     | 64                   | 1017963                                   | 10699           | 102             | 115298          | 5052                         | 116921           | 6168             | 156128           |
| 5                     | 69                   | 1097870                                   | 16680           | 118             | 40191           | 8972                         | 46852            | 19459            | 351238           |
| 5                     | 74                   | 978701                                    | 12088           | 104             | 24152           | 4446                         | 18894            | 48853            | 606227           |
| 5                     | 79                   | 962035                                    | 10026           | 103             | 21188           | 3818                         | 7770             | 105846           | 809252           |
| 5                     | 84                   | 998579                                    | 11650           | 86              | 17391           | 6120                         | 3551             | 183511           | 855501           |
| 5                     | 89                   | 963740                                    | 10525           | 121             | 20352           | 3181                         | 1757             | 263467           | 776097           |
| 5                     | 94                   | 1004586                                   | 12021           | 101             | 46590           | 4249                         | 1103             | 312101           | 596161           |
| 5                     | 99                   | 1075873                                   | 23521           | 154             | 24493           | 4135                         | 1106             | 342744           | 413320           |
| 5                     | 104                  | 1314092                                   | 19579           | 159             | 32156           | 3626                         | 2694             | 303603           | 265305           |

<sup>a</sup>(MR) = medium resolution data acquisition

<sup>b</sup>(LR) = low resolution data acquisition

<sup>c</sup>Intensities of all measured elements are adjusted by the addition of In (10 µg/L) as an internal standard.

**Additional file 1: Table S3.** Thermo Element® ICP-MS signal intensity (in counts per second) for a column calibration using 2.5 *N HCl* for the entire elution of a dissolved silicate volcanic rock. All column cuts were diluted to 15 mL prior to analysis. The data (recalculated as fraction of total eluted) are plotted in Fig. S1b.

| mL added to column | Cumulative volume | Na23(MR) <sup>a</sup><br>cps <sup>c</sup> | Mg24(MR)<br>cps | Ca46(MR)<br>cps | Fe56(MR)<br>cps | Sr88(LR) <sup>b</sup><br>cps | Ba137(LR)<br>cps | La139(LR)<br>cps | Ce140(LR)<br>cps |
|--------------------|-------------------|-------------------------------------------|-----------------|-----------------|-----------------|------------------------------|------------------|------------------|------------------|
| 0.5                | 0.5               | 867209                                    | 7225            | 88              | 81653           | 6365                         | 695              | 533              | 728              |
| 0.5                | 1                 | 1870432                                   | 771774          | 579577          | 83810           | 56004                        | 26533            | 1654             | 2391             |
| 0.5                | 1.5               | 2679033                                   | 1421703         | 2380064         | 12896816        | 87592                        | 43599            | 2227             | 3178             |
| 0.5                | 2                 | 1785031                                   | 407321          | 88847           | 52180080        | 18594                        | 5865             | 475              | 695              |
| 2                  | 4                 | 92642584                                  | 43613830        | 92384           | 143970784       | 34823                        | 7773             | 453              | 945              |
| 5                  | 9                 | 8837988                                   | 15475645        | 24601           | 3430386         | 2008859                      | 8863             | 622              | 1028             |
| 5                  | 14                | 1637760                                   | 204852          | 8066            | 530745          | 59409591                     | 23356            | 1754             | 3334             |
| 5                  | 19                | 1216770                                   | 10043           | 219             | 66994           | 3645621                      | 5642             | 433              | 939              |
| 5                  | 24                | 1220977                                   | 9520            | 106             | 55951           | 578035                       | 42805            | 422              | 834              |
| 5                  | 29                | 1174250                                   | 7216            | 96              | 69159           | 126380                       | 649453           | 859              | 5890             |
| 5                  | 34                | 1223211                                   | 7504            | 82              | 76929           | 21327                        | 1389533          | 3534             | 85139            |
| 5                  | 39                | 1143903                                   | 5927            | 93              | 557277          | 5117                         | 747635           | 27193            | 461911           |
| 5                  | 44                | 1300410                                   | 6818            | 104             | 558539          | 3829                         | 247749           | 125093           | 1116573          |
| 5                  | 49                | 1175395                                   | 8540            | 74              | 67402           | 3053                         | 76215            | 329648           | 1271331          |
| 5                  | 54                | 1182103                                   | 7064            | 70              | 75023           | 3220                         | 21524            | 487679           | 893200           |
| 5                  | 59                | 1233130                                   | 6529            | 81              | 109244          | 3317                         | 6034             | 466172           | 472026           |
| 5                  | 64                | 1135639                                   | 9212            | 74              | 112123          | 6343                         | 1946             | 330360           | 208386           |
| 5                  | 69                | 1200881                                   | 7804            | 56              | 158991          | 3823                         | 1053             | 191848           | 78792            |
| 5                  | 74                | 1154308                                   | 6951            | 72              | 163273          | 3342                         | 611              | 96409            | 30308            |
| 5                  | 79                | 1163780                                   | 7965            | 72              | 65732           | 4644                         | 556              | 41041            | 11818            |
| 5                  | 84                | 1073772                                   | 7124            | 44              | 74200           | 3409                         | 497              | 18198            | 5025             |
| 5                  | 89                | 1040628                                   | 6698            | 91              | 80397           | 3420                         | 470              | 8257             | 2605             |
| 5                  | 94                | 1074826                                   | 6325            | 64              | 53268           | 3437                         | 422              | 4201             | 1329             |
| 5                  | 99                | 1177035                                   | 6997            | 86              | 57038           | 3259                         | 467              | 2046             | 747              |
| 5                  | 104               | 1226613                                   | 8433            | 63              | 22646           | 5890                         | 595              | 1565             | 736              |

<sup>a</sup>(MR) = medium resolution data acquisition

<sup>b</sup>(LR) = low resolution data acquisition

<sup>c</sup>Intensities of all measured elements are adjusted by the addition of In (10 µg/L) as an internal standard.

**Additional file 1: Table S4.** Thermo Element® ICP-MS signal intensities (in counts per second) for a column calibration using 2.5 N HCl for the first 20 mL, and 3.0 N HNO<sub>3</sub> for the remaining elution of a produced water sample with 0.5 µg of La and Ce added. All column cuts were diluted to 15 mL prior to analysis. The data are plotted in modified form in Fig. S2a.

| mL added to column | Cumulative volume | Acid added             | Na23(MR) <sup>a</sup><br>cps <sup>d</sup> | Mg24(MR)<br>cps | Al27(MR)<br>cps | Si28(MR)<br>cps | S34(MR)<br>cps | K39(HR) <sup>b</sup><br>cps | Ca46(MR)<br>cps | Fe56(MR)<br>cps | Sr88(LR) <sup>c</sup><br>cps | Y89(LR)<br>cps | Ba137(LR)<br>cps | La139(LR)<br>cps | Ce140(LR)<br>cps |
|--------------------|-------------------|------------------------|-------------------------------------------|-----------------|-----------------|-----------------|----------------|-----------------------------|-----------------|-----------------|------------------------------|----------------|------------------|------------------|------------------|
| 0.5                | 0.5               | 2.5 N HCl              | 1492043                                   | 45945           | 357877          | 785913          | 1850           | 165388                      | 311             | 20067           | 44310                        | 1151           | 8105             | 1330             | 4722             |
| 0.5                | 1                 | 2.5 N HCl              | 742757                                    | 32799           | 437742          | 907572          | 2063           | 23385                       | 1196            | 78056           | 35872                        | 1368           | 4947             | 2356             | 3704             |
| 0.5                | 1.5               | 2.5 N HCl              | 767392                                    | 87434           | 461557          | 980422          | 3316           | 50142                       | 357             | 28563967        | 43328                        | 1726           | 9466             | 2686             | 3149             |
| 0.5                | 2                 | 2.5 N HCl              | 13770512                                  | 1569543         | 462240          | 843766          | 2266           | 54457                       | 344             | 66812001        | 28528                        | 1530           | 5685             | 1397             | 2669             |
| 2                  | 4                 | 2.5 N HCl              | 18039462798                               | 295885620       | 374705          | 762777          | 2275           | 708933                      | 315             | 85008992        | 32425                        | 1747           | 10271            | 1593             | 3378             |
| 4                  | 8                 | 2.5 N HCl              | 565707847                                 | 34066760        | 453139          | 836128          | 2284           | 102517143                   | 205402          | 821468          | 3119922261                   | 253571         | 25863            | 3470             | 6699             |
| 4                  | 12                | 2.5 N HCl              | 2272217                                   | 62679           | 504953          | 991926          | 2488           | 457974                      | 52380           | 48840           | 29337597781                  | 2293405        | 23161            | 773896           | 1232437          |
| 4                  | 16                | 2.5 N HCl              | 1884345                                   | 46761           | 543271          | 869805          | 2510           | 182274                      | 1322            | 40682           | 9435879424                   | 746155         | 39390            | 4943             | 5080             |
| 2                  | 18                | 2.5 N HCl              | 966444                                    | 50935           | 426542          | 800985          | 1749           | 45632                       | 424             | 60106           | 519531445                    | 37794          | 179017           | 4534             | 2944             |
| 1                  | 19                | 2.5 N HCl              | 1175030                                   | 53198           | 507444          | 759669          | 233862         | 27369                       | 3858            | 45081           | 57584124                     | 8109           | 306351           | 1609             | 3249             |
| 1                  | 20                | 2.5 N HCl              | 1333316                                   | 32744           | 511000          | 779674          | 1678           | 119882                      | 264             | 24906           | 37546196                     | 5873           | 821483           | 2135             | 3791             |
| 3                  | 23                | 3.0 N HNO <sub>3</sub> | 1181782                                   | 37651           | 445704          | 853311          | 3360           | 52326                       | 369             | 27484           | 55222856                     | 31038          | 596356064        | 222262           | 67543            |
| 3                  | 26                | 3.0 N HNO <sub>3</sub> | 2392347                                   | 40307           | 695960          | 819588          | 3299           | 84323                       | 306             | 38468           | 1686395                      | 3487           | 44929506         | 203934           | 1384128          |
| 1                  | 27                | 3.0 N HNO <sub>3</sub> | 1032505                                   | 47620           | 322902          | 727392          | 2010           | 39402                       | 668             | 14768           | 86556                        | 1389           | 100313           | 269022           | 1317992          |
| 1                  | 28                | 3.0 N HNO <sub>3</sub> | 713521                                    | 31694           | 345333          | 666968          | 1947           | 35224                       | 265             | 9381            | 68481                        | 1076           | 34773            | 513177           | 1855077          |
| 1                  | 29                | 3.0 N HNO <sub>3</sub> | 900980                                    | 28848           | 457254          | 767579          | 1856           | 102383                      | 261             | 68440           | 52668                        | 842            | 22673            | 826053           | 2135208          |
| 1                  | 30                | 3.0 N HNO <sub>3</sub> | 1387276                                   | 36861           | 321981          | 689030          | 2007           | 39912                       | 321             | 30873           | 49042                        | 813            | 17216            | 1232275          | 2293941          |
| 2                  | 32                | 3.0 N HNO <sub>3</sub> | 693647                                    | 30267           | 312130          | 629267          | 2039           | 14625                       | 318             | 16608           | 48340                        | 667            | 16694            | 3500133          | 3921648          |
| 2                  | 34                | 3.0 N HNO <sub>3</sub> | 1139737                                   | 34266           | 566392          | 768164          | 2335           | 26796                       | 303             | 33638           | 165926                       | 1459           | 10029            | 3860203          | 2416789          |
| 6                  | 40                | 3.0 N HNO <sub>3</sub> | 6376279                                   | 133000          | 828991          | 1024284         | 3161           | 58544                       | 501             | 44775           | 7848544                      | 2402           | 116114           | 6334504          | 1645992          |

<sup>a</sup>(MR) = medium resolution data acquisition

<sup>b</sup>(HR) = high resolution data acquisition

<sup>c</sup>(LR) = low resolution data acquisition

<sup>d</sup>Intensities of all measured elements are adjusted by the addition of In (10 µg/L) as an internal standard.

**Additional file 1: Table S5.** Thermo Element® ICP-MS signal intensities (in counts per second) for a column calibration using 2.5 N HCl for the first 20 mL, and 2.0 N HNO<sub>3</sub> for the remaining elution of dissolved freshwater mussel shell calcium carbonate. Approximately 4 µg of Ba and 0.1 µg of La and Ce were added. All column cuts were diluted to 15 mL prior to analysis. The data are plotted in modified form in Fig. S2b.

| mL added to column | Cumulative volume | Acid added             | Sr88(LR) <sup>a</sup><br>cps <sup>b</sup> | Y89(LR)<br>cps | Ba137(LR)<br>cps | La139(LR)<br>cps | Ce140(LR)<br>cps |
|--------------------|-------------------|------------------------|-------------------------------------------|----------------|------------------|------------------|------------------|
| 0.5                | 0.5               | 2.5 N HCl              | 22583                                     | 1119           | 9666             | 1128             | 2690             |
| 0.5                | 1                 | 2.5 N HCl              | 173789                                    | 13578          | 27275            | 15874            | 30621            |
| 1                  | 2                 | 2.5 N HCl              | 18429                                     | 1203           | 21445            | 1582             | 3902             |
| 3                  | 5                 | 2.5 N HCl              | 33707372                                  | 216248         | 149708           | 265769           | 420508           |
| 3                  | 8                 | 2.5 N HCl              | 126533559                                 | 475247         | 17819            | 2748             | 5545             |
| 3                  | 11                | 2.5 N HCl              | 131640311                                 | 726303         | 37059            | 3126             | 7625             |
| 3                  | 14                | 2.5 N HCl              | 61936028                                  | 935375         | 163439           | 4509             | 12737            |
| 3                  | 17                | 2.5 N HCl              | 12827786                                  | 924775         | 678477           | 8892             | 25433            |
| 3                  | 20                | 2.5 N HCl              | 3543712                                   | 611454         | 2153771          | 15431            | 47373            |
| 2                  | 22                | 2.0 N HNO <sub>3</sub> | 967084                                    | 167621         | 6504348          | 16657            | 47949            |
| 2                  | 24                | 2.0 N HNO <sub>3</sub> | 432597                                    | 69251          | 10298462         | 18604            | 52097            |
| 2                  | 26                | 2.0 N HNO <sub>3</sub> | 208285                                    | 55374          | 6137866          | 20990            | 68167            |
| 2                  | 28                | 2.0 N HNO <sub>3</sub> | 82843                                     | 24408          | 1413859          | 18969            | 43994            |
| 2                  | 30                | 2.0 N HNO <sub>3</sub> | 215657                                    | 40001          | 1381888          | 30727            | 98209            |
| 2                  | 32                | 2.0 N HNO <sub>3</sub> | 83876                                     | 32250          | 572540           | 39631            | 124554           |
| 2                  | 34                | 2.0 N HNO <sub>3</sub> | 32373                                     | 34802          | 355294           | 74117            | 236415           |
| 4                  | 38                | 2.0 N HNO <sub>3</sub> | 16677                                     | 30004          | 54131            | 145403           | 402060           |
| 4                  | 42                | 2.0 N HNO <sub>3</sub> | 33023                                     | 19679          | 8051             | 207276           | 481636           |
| 8                  | 50                | 2.0 N HNO <sub>3</sub> | 24583                                     | 21694          | 5562             | 692876           | 1077373          |
| 8                  | 58                | 2.0 N HNO <sub>3</sub> | 27713                                     | 10352          | 6171             | 911024           | 849891           |
| 2                  | 60                | 2.0 N HNO <sub>3</sub> | 17696                                     | 2390           | 4012             | 231068           | 149825           |

<sup>a</sup>(LR) = low resolution data acquisition

<sup>b</sup>Intensities of all measured elements are adjusted by the addition of In (10 µg/L) as an internal standard.

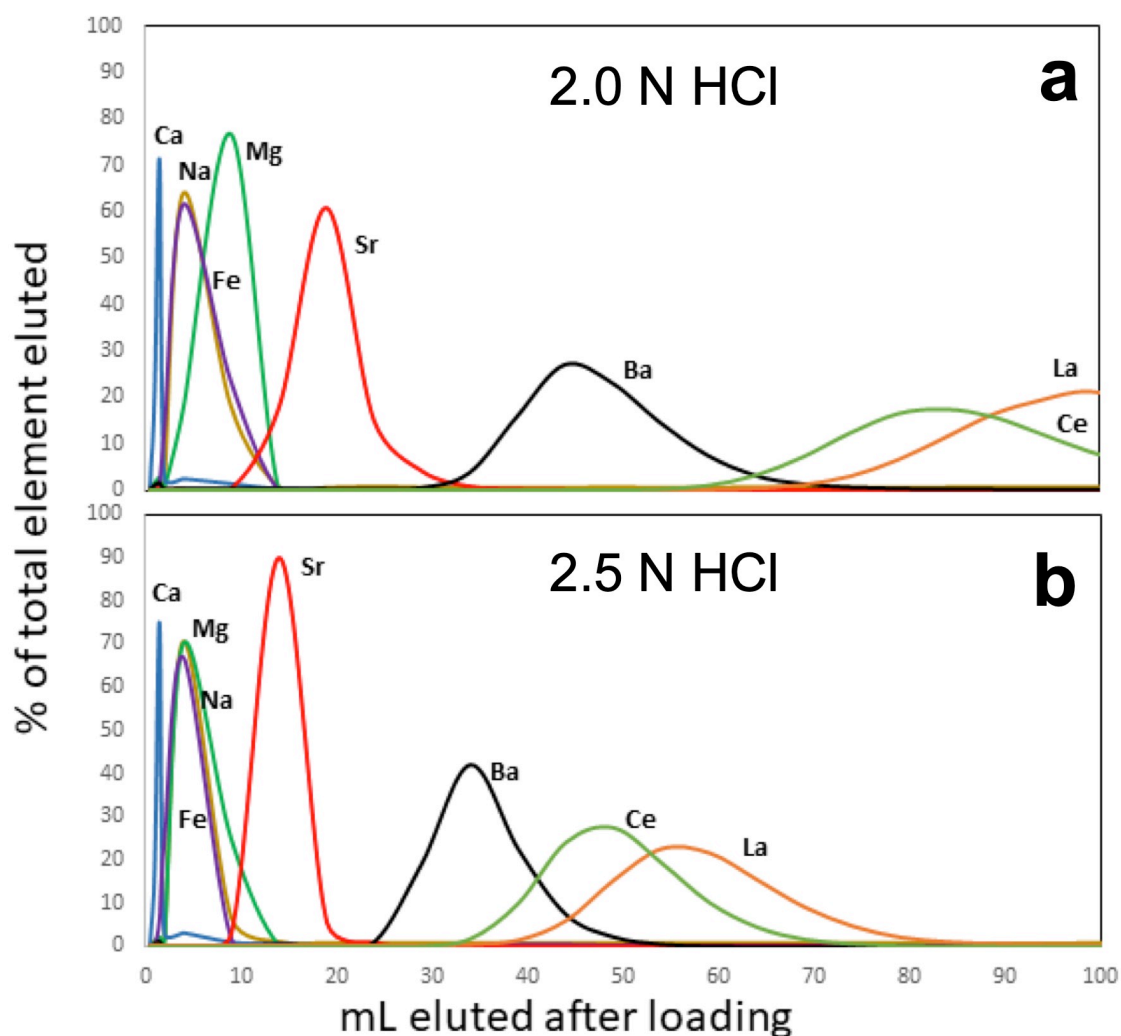

**Additional file 1: Fig. S1.** Examples of column matrix separation for major elements, Ba, and isobaric interferents La and Ce for a volcanic silicate sample using the BIO-RAD Poly-Prep® gravity flow ion exchange columns described in the manuscript. In both cases, the full elution was carried out with a single normality of hydrochloric acid (HCl). Eluting with 2.0 N HCl (a) leads to an effective separation of Ba from both major matrix elements and La and Ce, but requires relatively large volumes of acid. For example, nearly 30 mL of 2.0 N HCl is required to recover the Ba, in a column with a reservoir of only 10 mL. Cerium and La were not fully recovered when using 2.0 N HCl, so their % elution values are estimated. Use of 2.5 N HCl (b) leads to a tighter Ba elution curve and effective removal of matrix elements, but a less effective separation of Ba from La and Ce. Raw data used for these plots are provided in Tables S1 and S2.

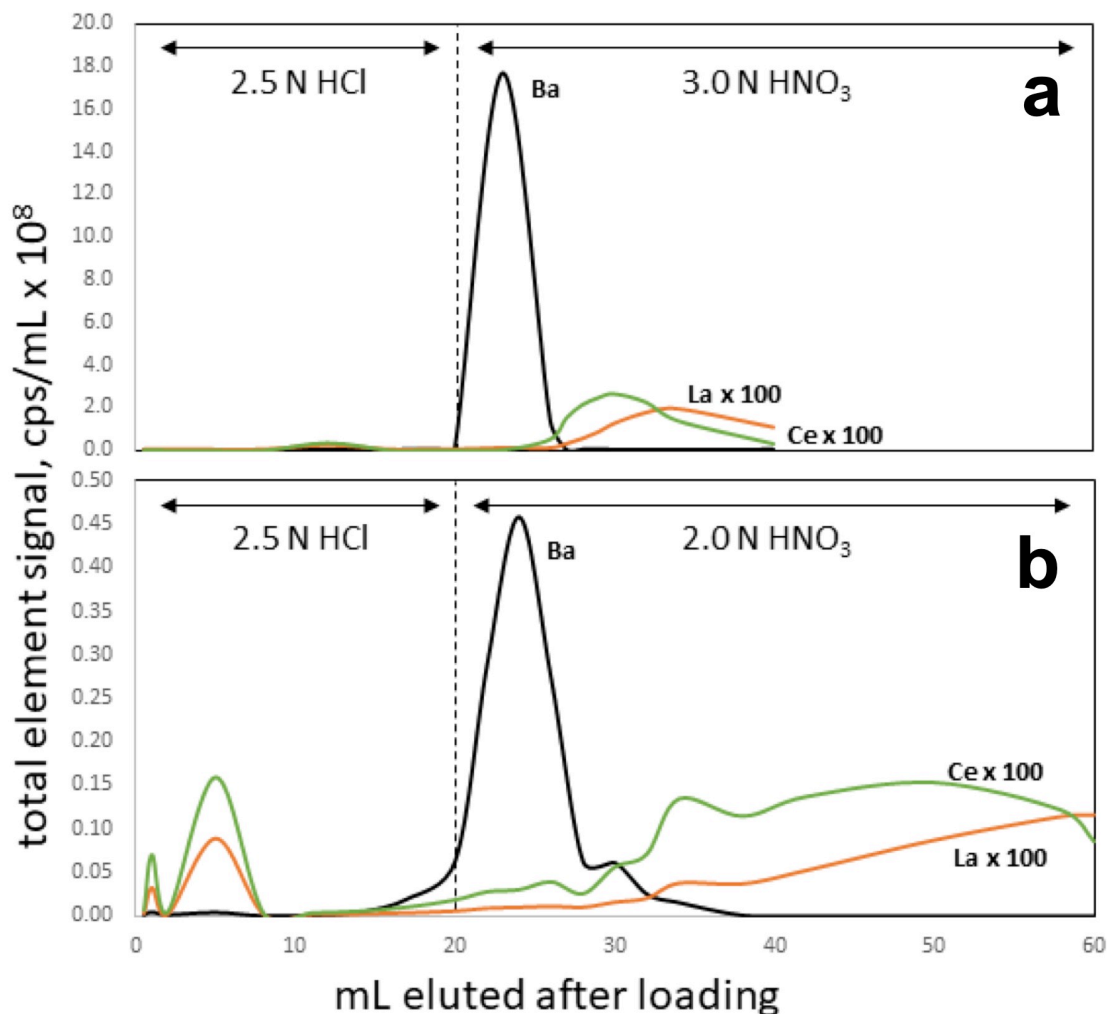

**Additional file 1: Fig. S2.** Examples of column matrix separation of Ba from isobaric interferents La and Ce for a produced water sample (a) and calcium carbonate sample (b) using the BIO-RAD Poly-Prep® gravity flow ion exchange columns described in the manuscript. In both cases, major cations (not shown) were eluted with 2.5 N HCl for the first 20 mL; afterward, either 2.0 N or 3.0 N HNO<sub>3</sub> was used to elute the remaining elements. The y-axis is the signal intensity (in counts per second by SF-ICP-MS) per mL of each column cut, recalculated to reflect the total element signature rather than just the measured isotope. Additional La and Ce was added to both samples prior to putting them through the column to provide enough of these elements to evaluate their separation from Ba. The La and Ce signals are multiplied by the factors shown in order to be clearly distinguishable on this diagram. Raw data used for these plots are provided in Tables S3 and S4.
